# Supplementary material for: Non-equilibrium phase transition in a model for supercoiling-dependent DNA transcription
Source: Royal Society of Chemistry journal article supplement (doi:10.1039/c7sm02452e), 2018-01-01
Supplement: c7sm02452e1.zip [file c7sm02452e1.zip]

Electronic Supplementary Information for *Soft  
Matter* manuscript:

**Non-equilibrium phase transition in a  
model for supercoiling-dependent DNA  
transcription**

A. Bentivoglio<sup>\*a</sup>, M. Ancona<sup>a</sup>, C. A. Brackley<sup>a</sup>, G. Gonnella<sup>b</sup>, and D. Marenduzzo<sup>a</sup>

<sup>a</sup> *SUPA, School of Physics and Astronomy, University of Edinburgh, Peter Guthrie  
Tait Road, Edinburgh EH9 3FD, United Kingdom.*

<sup>b</sup> *Dipartimento di Fisica, Università degli Studi di Bari and INFN, Sezione di Bari,  
70126 Bari, Italy*

<sup>\*</sup> *E-mail address, A.Bentivoglio@sms.ed.ac.uk*

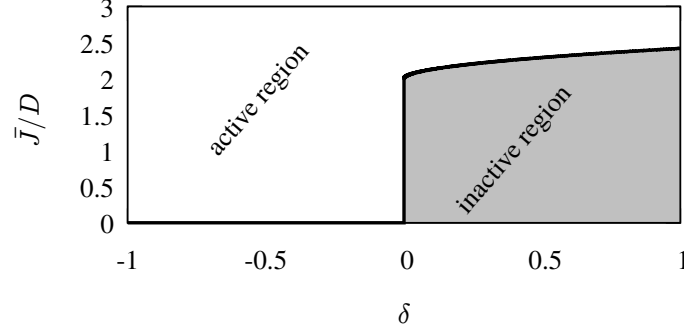

**Figure S1:** Phase diagram in  $\bar{J}/D$  vs  $\delta$  plane as predicted by the mean field theory. For  $\delta > 0$  the mean field predicts a discontinuous (first order) transition in accordance with our numerical simulations. The line of transitions at  $\delta = 0$  is continuous (second order) within the mean field theory.

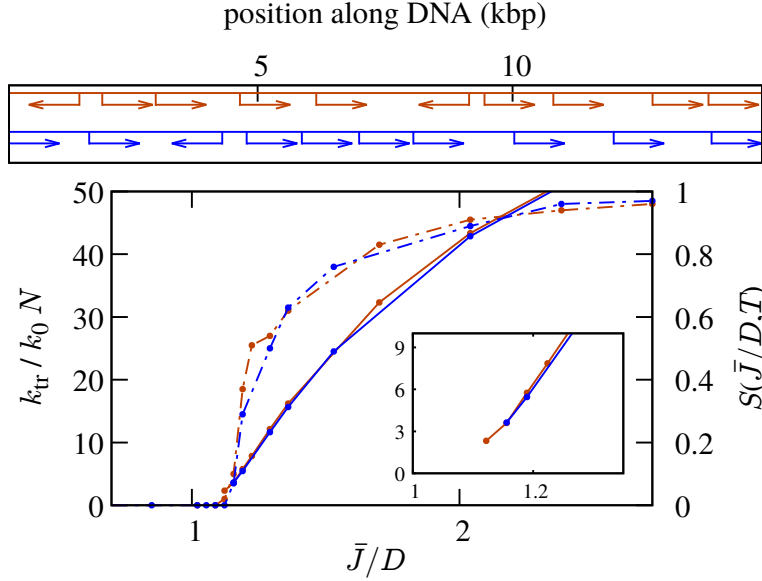

**Figure S2: Bidirectional genes.** Transcription rates normalised by  $k_0 N$  (solid curves) and survival probability  $S$  (dashed curves) for two different configurations (red and blue) of bidirectional genes as shown on the top of the figure. Data were obtained from 100 runs,  $10^8 \Delta t$  long, for every  $\bar{J}$  value. Our simulations suggest that the nature of the non-equilibrium transition does not change qualitatively. The trend of transcription rate is more similar to that one for a single gene. This is not surprising, indeed the pair of divergent genes picked stochastically by the system (see also Supplemental Material in [1]) is highly up regulated and their behaviour is more similar to that one for a single gene.

## References

- [1] C. A. Brackley, J. Johnson, A. Bentivoglio, S. Corless, N. Gilbert, G. Gonnella, and D. Marenduzzo. Stochastic model of supercoiling-dependent transcription. *Phys. Rev. Lett.*, 117:018101, 2016.
