# Supplementary figures and images for: Non-equilibrium phase transition in a model for supercoiling-dependent DNA transcription
Source: Royal Society of Chemistry journal article supplement (doi:10.1039/c7sm02452e), 2018-01-01

position along DNA (kbp)

5

10

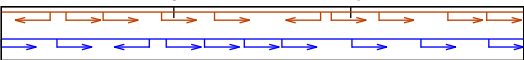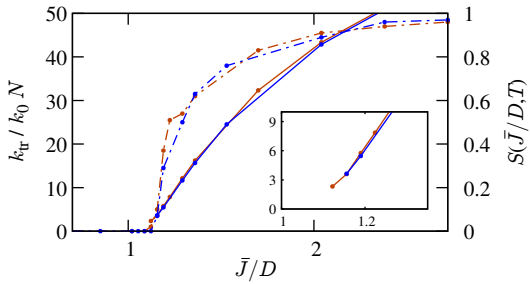

Supplement: c7sm02452e1.zip [file c7sm02452e1.zip]

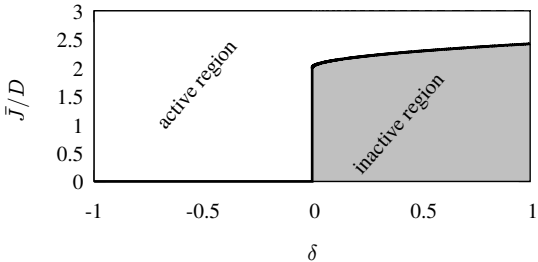

Supplement: c7sm02452e1.zip [file c7sm02452e1.zip]
